# Supplementary material
Source: PubMed Central journal article supplement (PMC3121507)
Supplement: supp_M110.201392_jbc.M110.201392-1.pdf [file supp_M110.201392_jbc.M110.201392-1.pdf]

## Supplemental Figure Legends

**Supplemental Figure 1:** The T274E mutation in G $\alpha$ 13 impairs RhoA activation *in vitro*. GTP $\gamma$ S binding to RhoA (final concentration 500 nM) was measured in the presence of buffer, 5 nM p115RhoGEF, or 5 nM p115RhoGEF and 100 nM AlF $_4^-$ -activated G $\alpha$ 13 (wild-type or mutant). Samples were incubated at 30 °C and quenched in ice-cold buffer containing 10 mM MgSO $_4$  at the indicated times. Samples are: RhoA only (●); p115RhoGEF (■); p115RhoGEF + G $\alpha$ 13 T274E/N278A (□); p115RhoGEF + G $\alpha$ 13 T274E (◇); p115RhoGEF + G $\alpha$ 13 N278A (□); p115RhoGEF + G $\alpha$ 13 (▲). Data presented are from a single experiment.

**Supplemental Figure 2:** A detailed view of the G $\alpha$ 13-p115 RH GAP interface. The complex is shown as a ribbon diagram with G $\alpha$ 13 colored in green and the RH domain of p115RhoGEF colored in yellow. Oxygen and nitrogen atoms are colored red and blue, respectively. Phosphate atoms are colored orange, while aluminum and fluoride atoms are light grey and light blue, respectively. GDP and AlF $_4^-$  are depicted as stick models, while the Mg $^{2+}$  co-factor is a purple sphere. Hydrogen bonds are depicted as dashed lines.

**Supplemental Figure 3:** Mutational analysis of the G $\alpha$ 12-RH-RhoGEF effector interface. **Upper panel:** The T277E and N281A mutations in G $\alpha$ 12 impair Rho activation in cells. HeLa cells were transiently transfected with empty vector or the indicated G $\alpha$ 12 QL construct. The luciferase activity of cell lysates was determined as described in Materials and Methods. Data are presented as the mean ( $\pm$  S.E.M.) of triplicate determinations from a single experiment, representative of two independent experiments with similar results. Total cell lysate was immunoblotted for either G $\alpha$ 12 or GAPDH. Data were analyzed by one-way ANOVA, followed by Dunnett's post-test. Statistically significant difference from G $\alpha$ 12 QL: ns, not significant; \*\*,  $p < 0.01$ . **Lower panel:** The T277E mutation in G $\alpha$ 12 impairs binding to the RH domain of p115RhoGEF. HEK293 cells were transiently transfected with wild-type G $\alpha$ 12 or the indicated mutant. Detergent-soluble cell extracts were incubated with 250 pmoles of GST-p115 RH in the presence or absence of AlF $_4^-$  and GST-p115 RH was pulled down with glutathione Sepharose beads. Bound proteins were released by the addition of SDS-PAGE sample buffer and boiling, and separated by SDS-PAGE. G $\alpha$ 12 was detected by immunoblotting, and GST-p115 RH was stained with Coomassie Brilliant blue. Data presented are from one experiment, representative of two independent experiments with similar results.

Supplemental Figure 1

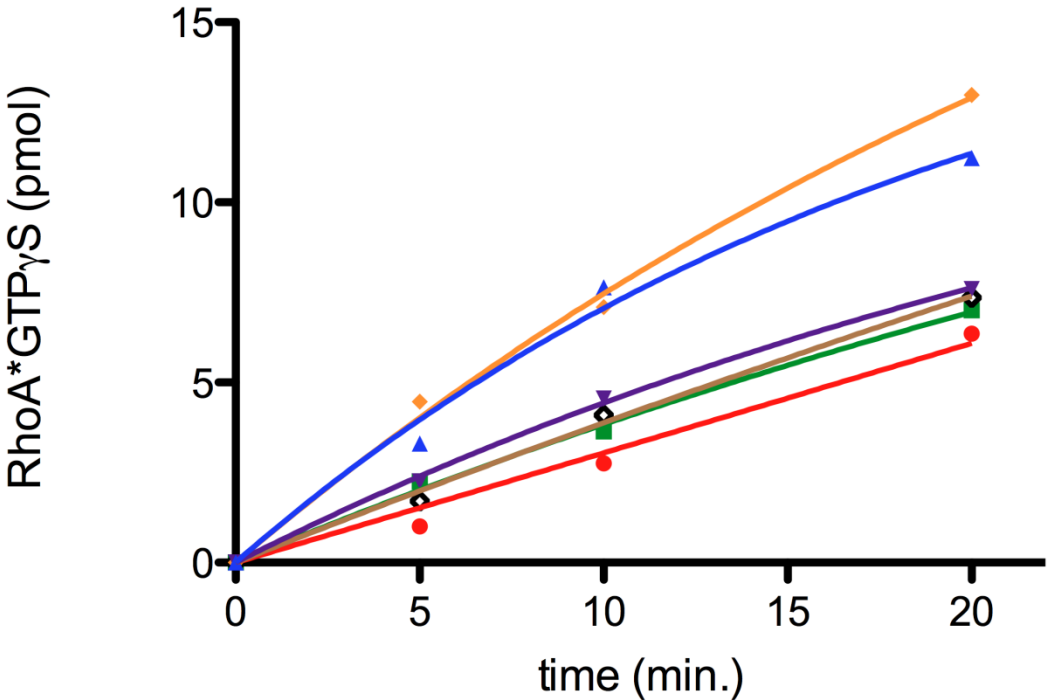

Supplemental Figure 2

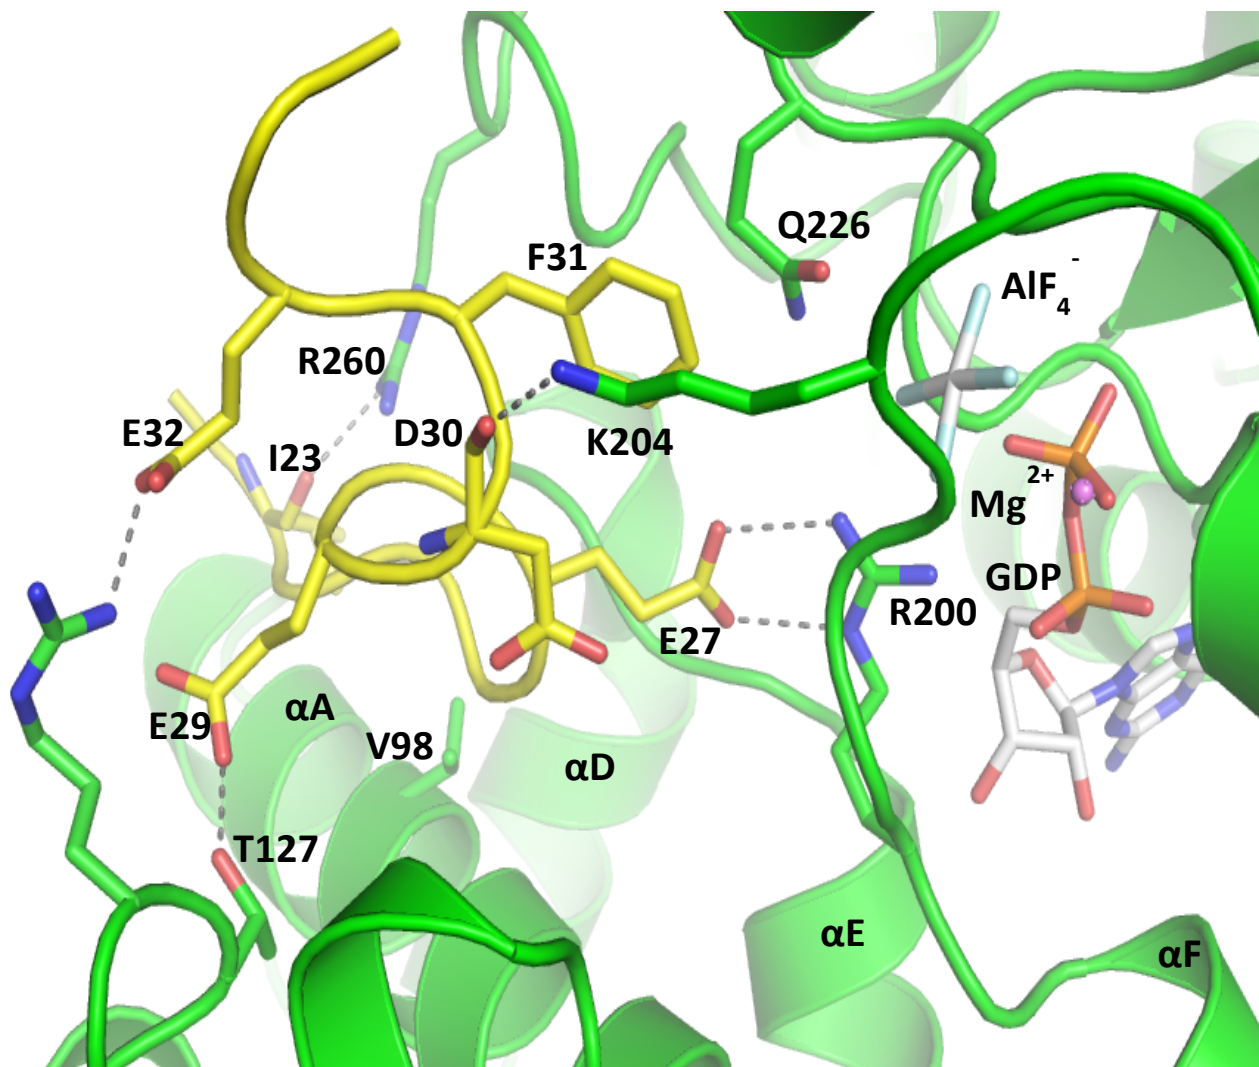



Supplemental Table I

**p115RhoGEF residues (Chain B)**

|      | S22                  | I23                    | I24                  | G25 | A26                    | E27                    | D28 | E29                    | D30                  | F31                    | E32                  | A67                    | L68                    | Q69                  | F70                    | K160                 | M163                 | M165                   | T166                   | E169                   | E171                   | L172 | E176 | T207                   | I208 |
|------|----------------------|------------------------|----------------------|-----|------------------------|------------------------|-----|------------------------|----------------------|------------------------|----------------------|------------------------|------------------------|----------------------|------------------------|----------------------|----------------------|------------------------|------------------------|------------------------|------------------------|------|------|------------------------|------|
| V98  |                      |                        |                      |     | hydrophobic contact(s) |                        |     |                        |                      |                        |                      |                        |                        |                      |                        |                      |                      |                        |                        |                        |                        |      |      |                        |      |
| D101 |                      |                        | M-S hydrogen bond(s) |     |                        |                        |     |                        |                      |                        |                      |                        |                        |                      |                        |                      |                      |                        |                        |                        |                        |      |      |                        |      |
| A102 |                      |                        |                      |     |                        |                        |     |                        |                      |                        |                      |                        |                        |                      |                        |                      |                      |                        |                        |                        |                        |      |      |                        |      |
| K105 | M-S hydrogen bond(s) | hydrophobic contact(s) |                      |     |                        |                        |     |                        |                      |                        |                      |                        |                        |                      |                        |                      |                      |                        |                        |                        |                        |      |      |                        |      |
| L106 |                      |                        |                      |     |                        |                        |     |                        |                      |                        |                      |                        |                        |                      |                        |                      |                      |                        |                        |                        |                        |      |      |                        |      |
| T127 |                      |                        |                      |     |                        |                        |     | S-S hydrogen bond(s)   |                      |                        |                      |                        |                        |                      |                        |                      |                      |                        |                        |                        |                        |      |      |                        |      |
| R128 |                      |                        |                      |     |                        |                        |     | hydrophobic contact(s) |                      |                        | S-S hydrogen bond(s) |                        |                        |                      |                        |                      |                      |                        |                        |                        |                        |      |      |                        |      |
| F168 |                      |                        |                      |     |                        |                        |     |                        |                      |                        |                      |                        |                        |                      |                        |                      |                      |                        |                        |                        |                        |      |      |                        |      |
| R200 |                      |                        |                      |     |                        |                        |     | S-S hydrogen bond(s)   |                      |                        |                      |                        |                        |                      |                        |                      |                      |                        |                        |                        |                        |      |      |                        |      |
| P202 |                      |                        |                      |     |                        | hydrophobic contact(s) |     |                        |                      |                        |                      |                        |                        |                      |                        |                      |                      |                        |                        |                        |                        |      |      |                        |      |
| K204 |                      |                        |                      |     |                        |                        |     |                        | M-S hydrogen bond(s) | hydrophobic contact(s) |                      |                        |                        |                      |                        |                      |                      |                        |                        |                        |                        |      |      |                        |      |
| Q226 |                      |                        |                      |     |                        |                        |     |                        |                      | hydrophobic contact(s) |                      |                        |                        |                      |                        |                      |                      |                        |                        |                        |                        |      |      |                        |      |
| S228 |                      |                        |                      |     |                        |                        |     |                        |                      |                        |                      |                        |                        |                      |                        |                      |                      |                        |                        |                        |                        |      |      |                        |      |
| R230 |                      |                        |                      |     |                        |                        |     |                        |                      |                        |                      |                        |                        |                      |                        |                      | M-S hydrogen bond(s) | hydrophobic contact(s) |                        |                        |                        |      |      |                        |      |
| K231 |                      |                        |                      |     |                        |                        |     |                        |                      |                        |                      |                        |                        |                      |                        |                      |                      |                        |                        |                        | hydrophobic contact(s) |      |      |                        |      |
| F234 |                      |                        |                      |     |                        |                        |     |                        |                      |                        |                      |                        |                        |                      |                        |                      |                      |                        | hydrophobic contact(s) | hydrophobic contact(s) |                        |      |      |                        |      |
| F237 |                      |                        |                      |     |                        |                        |     |                        |                      |                        |                      |                        |                        |                      |                        |                      |                      |                        |                        |                        |                        |      |      |                        |      |
| M257 |                      |                        |                      |     |                        |                        |     |                        |                      | hydrophobic contact(s) |                      |                        |                        |                      |                        |                      |                      |                        |                        |                        |                        |      |      |                        |      |
| R260 |                      | M-S hydrogen bond(s)   |                      |     |                        |                        |     |                        |                      |                        |                      |                        |                        |                      |                        |                      |                      |                        |                        |                        |                        |      |      |                        |      |
| E267 |                      |                        |                      |     |                        |                        |     |                        |                      |                        |                      |                        |                        |                      |                        |                      |                      |                        |                        |                        |                        |      |      |                        |      |
| N270 |                      |                        |                      |     |                        |                        |     |                        |                      |                        |                      |                        |                        |                      |                        |                      | M-S hydrogen bond(s) | hydrophobic contact(s) |                        |                        |                        |      |      |                        |      |
| I271 |                      |                        |                      |     |                        |                        |     |                        |                      |                        |                      |                        |                        |                      |                        |                      |                      |                        | hydrophobic contact(s) |                        |                        |      |      |                        |      |
| E273 |                      |                        |                      |     |                        |                        |     |                        |                      |                        |                      |                        |                        |                      |                        | S-S hydrogen bond(s) |                      |                        |                        |                        |                        |      |      |                        |      |
| T274 |                      |                        |                      |     |                        |                        |     |                        |                      |                        |                      |                        |                        | M-S hydrogen bond(s) |                        |                      |                      |                        |                        |                        |                        |      |      |                        |      |
| I275 |                      |                        |                      |     |                        |                        |     |                        |                      |                        |                      |                        |                        |                      |                        |                      |                      |                        | hydrophobic contact(s) |                        |                        |      |      |                        |      |
| N278 |                      |                        |                      |     |                        |                        |     |                        |                      |                        |                      |                        | hydrophobic contact(s) |                      |                        |                      |                      |                        |                        |                        |                        |      |      |                        |      |
| R279 |                      |                        |                      |     |                        |                        |     |                        |                      |                        |                      | M-S hydrogen bond(s)   | M-M hydrogen bond(s)   |                      | M-S hydrogen bond(s)   |                      |                      |                        |                        |                        |                        |      |      |                        |      |
| V280 |                      |                        |                      |     |                        |                        |     |                        |                      |                        |                      | hydrophobic contact(s) |                        |                      |                        |                      |                      |                        |                        |                        |                        |      |      | hydrophobic contact(s) |      |
| S282 |                      |                        |                      |     |                        |                        |     |                        |                      |                        |                      |                        |                        |                      |                        |                      |                      |                        |                        |                        |                        |      |      |                        |      |
| N283 |                      |                        |                      |     |                        |                        |     |                        |                      |                        |                      |                        |                        |                      |                        |                      |                      |                        |                        |                        |                        |      |      |                        |      |
| R335 |                      |                        |                      |     |                        |                        |     |                        |                      |                        |                      |                        |                        |                      | hydrophobic contact(s) |                      |                      |                        |                        |                        |                        |      |      |                        |      |

Residues involved in

|                        |                      |                      |                      |
|------------------------|----------------------|----------------------|----------------------|
| hydrophobic contact(s) | M-S hydrogen bond(s) | S-S hydrogen bond(s) | M-M hydrogen bond(s) |
|------------------------|----------------------|----------------------|----------------------|

M- main chain  
S- side chain

Supplemental Table II

p115RhoGEF residues (Chain D)

|      | S22                  | I23                    | I24                    | G25                    | A26 | E27                    | D28                  | E29                    | D30                  | F31                    | E32                  | A67                  | L68                    | Q69                    | F70                    | K160                 | M163                 | M165                   | T166                   | E169                   | E171 | L172 | E176 | T207                   | I208 |  |
|------|----------------------|------------------------|------------------------|------------------------|-----|------------------------|----------------------|------------------------|----------------------|------------------------|----------------------|----------------------|------------------------|------------------------|------------------------|----------------------|----------------------|------------------------|------------------------|------------------------|------|------|------|------------------------|------|--|
| V98  |                      |                        | hydrophobic contact(s) | hydrophobic contact(s) |     |                        |                      |                        |                      |                        |                      |                      |                        |                        |                        |                      |                      |                        |                        |                        |      |      |      |                        |      |  |
| D101 |                      |                        | M-S hydrogen bond(s)   |                        |     |                        |                      |                        |                      |                        |                      |                      |                        |                        |                        |                      |                      |                        |                        |                        |      |      |      |                        |      |  |
| A102 |                      | hydrophobic contact(s) |                        |                        |     |                        |                      |                        |                      |                        |                      |                      |                        |                        |                        |                      |                      |                        |                        |                        |      |      |      |                        |      |  |
| K105 | M-S hydrogen bond(s) |                        |                        |                        |     |                        |                      |                        |                      |                        |                      |                      |                        |                        |                        |                      |                      |                        |                        |                        |      |      |      |                        |      |  |
| L106 |                      | hydrophobic contact(s) |                        |                        |     |                        |                      |                        |                      |                        |                      |                      |                        |                        |                        |                      |                      |                        |                        |                        |      |      |      |                        |      |  |
| T127 |                      |                        |                        |                        |     |                        |                      | S-S hydrogen bond(s)   |                      |                        |                      |                      |                        |                        |                        |                      |                      |                        |                        |                        |      |      |      |                        |      |  |
| R128 |                      |                        |                        |                        |     |                        |                      | hydrophobic contact(s) |                      |                        | S-S hydrogen bond(s) |                      |                        |                        |                        |                      |                      |                        |                        |                        |      |      |      |                        |      |  |
| F168 |                      | hydrophobic contact(s) |                        |                        |     |                        |                      |                        |                      |                        |                      |                      |                        |                        |                        |                      |                      |                        |                        |                        |      |      |      |                        |      |  |
| R200 |                      |                        |                        |                        |     | S-S hydrogen bond(s)   |                      |                        |                      |                        |                      |                      |                        |                        |                        |                      |                      |                        |                        |                        |      |      |      |                        |      |  |
| P202 |                      |                        |                        |                        |     | hydrophobic contact(s) |                      |                        |                      |                        |                      |                      |                        |                        |                        |                      |                      |                        |                        |                        |      |      |      |                        |      |  |
| K204 |                      |                        |                        |                        |     |                        |                      |                        | M-S hydrogen bond(s) | hydrophobic contact(s) |                      |                      |                        |                        |                        |                      |                      |                        |                        |                        |      |      |      |                        |      |  |
| Q226 |                      |                        |                        |                        |     |                        |                      |                        |                      | hydrophobic contact(s) |                      |                      |                        |                        |                        |                      |                      |                        |                        |                        |      |      |      |                        |      |  |
| S228 |                      |                        |                        |                        |     |                        |                      |                        |                      |                        |                      |                      |                        |                        |                        |                      |                      |                        |                        |                        |      |      |      |                        |      |  |
| R230 |                      |                        |                        |                        |     |                        |                      |                        |                      |                        |                      |                      |                        |                        |                        |                      | M-S hydrogen bond(s) | hydrophobic contact(s) |                        |                        |      |      |      |                        |      |  |
| K231 |                      |                        |                        |                        |     |                        |                      |                        |                      |                        |                      |                      |                        |                        |                        |                      |                      |                        |                        |                        |      |      |      |                        |      |  |
| F234 |                      |                        |                        |                        |     |                        |                      |                        |                      |                        |                      |                      |                        |                        |                        |                      |                      |                        | hydrophobic contact(s) | hydrophobic contact(s) |      |      |      |                        |      |  |
| F237 |                      |                        |                        |                        |     |                        |                      |                        |                      |                        |                      |                      |                        |                        |                        |                      |                      |                        |                        |                        |      |      |      |                        |      |  |
| M257 |                      |                        |                        |                        |     |                        |                      |                        |                      |                        |                      |                      |                        |                        |                        |                      |                      |                        |                        |                        |      |      |      |                        |      |  |
| R260 | M-S hydrogen bond(s) |                        |                        |                        |     |                        | S-S hydrogen bond(s) |                        |                      |                        |                      |                      |                        |                        |                        |                      |                      |                        |                        |                        |      |      |      |                        |      |  |
| E267 |                      |                        |                        |                        |     |                        |                      |                        |                      |                        |                      |                      |                        |                        |                        |                      |                      |                        |                        |                        |      |      |      |                        |      |  |
| N270 |                      |                        |                        |                        |     |                        |                      |                        |                      |                        |                      |                      |                        |                        |                        |                      |                      | hydrophobic contact(s) |                        |                        |      |      |      |                        |      |  |
| I271 |                      |                        |                        |                        |     |                        |                      |                        |                      |                        |                      |                      |                        |                        |                        |                      |                      |                        | hydrophobic contact(s) |                        |      |      |      |                        |      |  |
| E273 |                      |                        |                        |                        |     |                        |                      |                        |                      |                        |                      |                      |                        |                        |                        | S-S hydrogen bond(s) |                      |                        |                        |                        |      |      |      |                        |      |  |
| T274 |                      |                        |                        |                        |     |                        |                      |                        |                      |                        |                      |                      |                        | M-S hydrogen bond(s)   |                        | S-S hydrogen bond(s) |                      | hydrophobic contact(s) |                        |                        |      |      |      |                        |      |  |
| I275 |                      |                        |                        |                        |     |                        |                      |                        |                      |                        |                      |                      |                        |                        |                        |                      |                      |                        |                        |                        |      |      |      |                        |      |  |
| N278 |                      |                        |                        |                        |     |                        |                      |                        |                      |                        |                      |                      |                        | hydrophobic contact(s) |                        |                      |                      |                        |                        |                        |      |      |      |                        |      |  |
| R279 |                      |                        |                        |                        |     |                        |                      |                        |                      |                        |                      | M-S hydrogen bond(s) | M-M hydrogen bond(s)   |                        | M-S hydrogen bond(s)   |                      |                      |                        |                        |                        |      |      |      |                        |      |  |
| V280 |                      |                        |                        |                        |     |                        |                      |                        |                      |                        |                      |                      | hydrophobic contact(s) |                        |                        |                      |                      |                        |                        |                        |      |      |      | hydrophobic contact(s) |      |  |
| S282 |                      |                        |                        |                        |     |                        |                      |                        |                      |                        |                      |                      |                        |                        |                        |                      |                      |                        |                        |                        |      |      |      |                        |      |  |
| N283 |                      |                        |                        |                        |     |                        |                      |                        |                      |                        |                      |                      |                        |                        |                        |                      |                      |                        |                        |                        |      |      |      |                        |      |  |
| R335 |                      |                        |                        |                        |     |                        |                      |                        |                      |                        |                      |                      |                        |                        | hydrophobic contact(s) |                      |                      |                        |                        |                        |      |      |      |                        |      |  |

Residues involved in  
 hydrophobic contact(s)   
 M-S hydrogen bond(s)   
 S-S hydrogen bond(s)   
 M-M hydrogen bond(s)

M- main chain  
S- side chain

Supplemental Table III

PDZ-RhoGEF residues

|      | L307 | I308 | I309 | G310 | P311 | E312 | . | E313 | D314 | Y315 | D316 | L349 | S350 | Q351 | A352 | K439 | L442 | L444 | G445 | . | S446 | L447 | N451 | K480 | IY481 |
|------|------|------|------|------|------|------|---|------|------|------|------|------|------|------|------|------|------|------|------|---|------|------|------|------|-------|
| V98  |      |      |      |      |      |      |   |      |      |      |      |      |      |      |      |      |      |      |      |   |      |      |      |      |       |
| D101 |      |      |      |      |      |      |   |      |      |      |      |      |      |      |      |      |      |      |      |   |      |      |      |      |       |
| A102 |      |      |      |      |      |      |   |      |      |      |      |      |      |      |      |      |      |      |      |   |      |      |      |      |       |
| K105 |      |      |      |      |      |      |   |      |      |      |      |      |      |      |      |      |      |      |      |   |      |      |      |      |       |
| L106 |      |      |      |      |      |      |   |      |      |      |      |      |      |      |      |      |      |      |      |   |      |      |      |      |       |
| T127 |      |      |      |      |      |      |   |      |      |      |      |      |      |      |      |      |      |      |      |   |      |      |      |      |       |
| R128 |      |      |      |      |      |      |   |      |      |      |      |      |      |      |      |      |      |      |      |   |      |      |      |      |       |
| F168 |      |      |      |      |      |      |   |      |      |      |      |      |      |      |      |      |      |      |      |   |      |      |      |      |       |
| R200 |      |      |      |      |      |      |   |      |      |      |      |      |      |      |      |      |      |      |      |   |      |      |      |      |       |
| P202 |      |      |      |      |      |      |   |      |      |      |      |      |      |      |      |      |      |      |      |   |      |      |      |      |       |
| K204 |      |      |      |      |      |      |   |      |      |      |      |      |      |      |      |      |      |      |      |   |      |      |      |      |       |
| Q226 |      |      |      |      |      |      |   |      |      |      |      |      |      |      |      |      |      |      |      |   |      |      |      |      |       |
| S228 |      |      |      |      |      |      |   |      |      |      |      |      |      |      |      |      |      |      |      |   |      |      |      |      |       |
| R230 |      |      |      |      |      |      |   |      |      |      |      |      |      |      |      |      |      |      |      |   |      |      |      |      |       |
| K231 |      |      |      |      |      |      |   |      |      |      |      |      |      |      |      |      |      |      |      |   |      |      |      |      |       |
| F234 |      |      |      |      |      |      |   |      |      |      |      |      |      |      |      |      |      |      |      |   |      |      |      |      |       |
| F237 |      |      |      |      |      |      |   |      |      |      |      |      |      |      |      |      |      |      |      |   |      |      |      |      |       |
| M257 |      |      |      |      |      |      |   |      |      |      |      |      |      |      |      |      |      |      |      |   |      |      |      |      |       |
| R260 |      |      |      |      |      |      |   |      |      |      |      |      |      |      |      |      |      |      |      |   |      |      |      |      |       |
| E267 |      |      |      |      |      |      |   |      |      |      |      |      |      |      |      |      |      |      |      |   |      |      |      |      |       |
| N270 |      |      |      |      |      |      |   |      |      |      |      |      |      |      |      |      |      |      |      |   |      |      |      |      |       |
| I271 |      |      |      |      |      |      |   |      |      |      |      |      |      |      |      |      |      |      |      |   |      |      |      |      |       |
| E273 |      |      |      |      |      |      |   |      |      |      |      |      |      |      |      |      |      |      |      |   |      |      |      |      |       |
| T274 |      |      |      |      |      |      |   |      |      |      |      |      |      |      |      |      |      |      |      |   |      |      |      |      |       |
| I275 |      |      |      |      |      |      |   |      |      |      |      |      |      |      |      |      |      |      |      |   |      |      |      |      |       |
| N278 |      |      |      |      |      |      |   |      |      |      |      |      |      |      |      |      |      |      |      |   |      |      |      |      |       |
| R279 |      |      |      |      |      |      |   |      |      |      |      |      |      |      |      |      |      |      |      |   |      |      |      |      |       |
| V280 |      |      |      |      |      |      |   |      |      |      |      |      |      |      |      |      |      |      |      |   |      |      |      |      |       |
| S282 |      |      |      |      |      |      |   |      |      |      |      |      |      |      |      |      |      |      |      |   |      |      |      |      |       |
| N283 |      |      |      |      |      |      |   |      |      |      |      |      |      |      |      |      |      |      |      |   |      |      |      |      |       |
| R335 |      |      |      |      |      |      |   |      |      |      |      |      |      |      |      |      |      |      |      |   |      |      |      |      |       |

Residues involved in

|                                                                                                            |                                                                                                          |                                                                                                          |                                                                                                            |
|------------------------------------------------------------------------------------------------------------|----------------------------------------------------------------------------------------------------------|----------------------------------------------------------------------------------------------------------|------------------------------------------------------------------------------------------------------------|
|  hydrophobic contact(s) |  M-S hydrogen bond(s) |  S-S hydrogen bond(s) |  M-M hydrogen bond(s) |
|------------------------------------------------------------------------------------------------------------|----------------------------------------------------------------------------------------------------------|----------------------------------------------------------------------------------------------------------|------------------------------------------------------------------------------------------------------------|

M- main chain  
S- side chain
